# Supplementary material for: Strategic Paths to Sustainability: A GRI-Based Comparative Analysis of Enerjisa, E.ON, and Enel in the Energy Sector
Source: Research Square preprint supplement (doi:10.21203/rs.3.rs-8212967/v1), 2026-01-09
Supplement: Supplementary file 1 [file 24e3fb74dbcd5ad5f3ca8e94.docx]

# Supplementary File S1 – GRI-Based Codebook and Coding Scheme

Purpose:
This codebook documents the GRI-based coding framework used in the qualitative content analysis of sustainability disclosures by Enerjisa, E.ON, and Enel (2023). It ensures transparency, consistency, and replicability in line with the reviewer’s request for full documentation of variables and coding schemes.

Unit of Analysis:
The unit of analysis is firm-level disclosure for each GRI indicator, based on the companies’ 2023 Sustainability Reports and Integrated Annual Reports.

Indicators Included:
The following indicators constitute the full analytical framework of the study:

- GRI 302 – Energy

- GRI 305 – Emissions

- Net Zero Target Year

- GRI 304 – Biodiversity

- GRI 307 – Environmental Compliance

- GRI 401 – Employment

- GRI 403 – Occupational Health & Safety

- GRI 405 – Diversity & Equality

- GRI 413 – Local Communities

Operational Definitions:

• GRI 302 (Energy): Disclosures related to total energy consumption, energy intensity, renewable energy use, and integration of energy efficiency into business strategy.

• GRI 305 (Emissions): Disclosures on Scope 1, Scope 2, and (where available) Scope 3 greenhouse gas emissions, emission intensity, reduction targets, and decarbonization pathways.

• Net Zero Target Year: Publicly stated target year for achieving net-zero greenhouse gas emissions, including interim targets where applicable.

• GRI 304 (Biodiversity): Disclosures concerning impacts on biodiversity, land use, ecosystem protection measures, and restoration initiatives.

• GRI 307 (Environmental Compliance): Information on compliance with environmental laws and regulations, including reported incidents, fines, or the absence thereof.

• GRI 401 (Employment): Disclosures related to workforce size, employment contracts, turnover rates, and employment stability.

• GRI 403 (Occupational Health & Safety): Information on occupational health and safety management systems, injury rates (e.g., LTIF/TRIF), and preventive measures.

• GRI 405 (Diversity & Equality): Disclosures on workforce diversity, gender balance, equality policies, and representation in management.

• GRI 413 (Local Communities): Information on community engagement, social investment, stakeholder dialogue, and local impact initiatives.

Scoring Scale (1–5):

1 = No disclosure or negligible mention of the indicator.
2 = Symbolic or narrative disclosure without quantitative data.
3 = Quantitative disclosure at a basic compliance level.
4 = Quantitative disclosure with targets, programs, or structured initiatives.
5 = Strategic integration, including governance linkage and long-term commitments.

Normalization:
Normalized Score (%) = (Indicator Score / 5) × 100

Coding Rules:
• Scores reflect disclosure depth and strategic integration rather than operational performance.
• Conservative scoring is applied in cases of ambiguity.
• Multiple disclosures within a report are consolidated at the indicator level.
• Missing disclosure is explicitly coded as “not disclosed.”
