# Supplementary material for: Strategic Paths to Sustainability: A GRI-Based Comparative Analysis of Enerjisa, E.ON, and Enel in the Energy Sector
Source: Research Square preprint supplement (doi:10.21203/rs.3.rs-8212967/v1), 2026-01-09
Supplement: Supplementary file 2 [file 2b10c3cb5e7afcbe58e5f377.docx]

**Supplementary File S4**

**Audit Trail: Data Processing and Analysis Protocol**

**Title: Audit Trail and Analytical Workflow for the GRI-Based Content Analysis of Enerjisa, E.ON, and Enel**

**S4.1. Purpose of the Audit Trail**

This audit trail documents, step by step, the entire analytical workflow followed in the study “Strategic Paths to Sustainability: A GRI-Based Comparative Analysis of Enerjisa, E.ON, and Enel in the Energy Sector.”

Its purpose is to provide editors and referees with a transparent, verifiable, and replicable account of:

- how data were identified and retrieved,
- how disclosures were extracted and coded,
- how scores were assigned and transformed, and
- how final comparative results and S-curve classifications were derived.

This document enables full methodological scrutiny in line with best practices for qualitative content analysis and research transparency.

**S4.2. Step 1 – Identification and Retrieval of Source Documents**

**Data Source Selection**

The study relies exclusively on publicly available corporate disclosures, selected based on the following criteria:

1. Official publication by the company
2. Alignment with the Global Reporting Initiative (GRI) framework
3. Coverage of the fiscal year 2023
4. Accessibility via stable corporate websites

**Primary Documents**

- Enerjisa:
  - Annual Report 2023
  - Sustainability Report / Sustainability portal (2023)
- E.ON:
  - Integrated Annual Report 2023
  - Sustainability portal (2023)
- Enel:
  - Integrated Annual Report 2023
  - Sustainability Report / Sustainability portal (2023)

All documents were downloaded directly from official investor relations or sustainability webpages and archived locally for analysis.

**S4.3. Step 2 – Definition of Analytical Scope and Indicators**

**Analytical Scope**

The analysis focuses on strategically relevant ESG disclosures rather than exhaustive GRI coverage. Indicators were selected to capture sustainability dimensions most directly linked to:

- energy-sector materiality,
- strategic integration, and
- long-term performance and legitimacy.

**Indicators Included**

Six GRI indicators were selected (documented in Supplementary File S1):

- GRI 302 – Energy
- GRI 305 – Emissions
- GRI 304 – Biodiversity
- GRI 307 – Environmental Compliance
- GRI 403 – Occupational Health & Safety
- GRI 413 – Local Communities

Each indicator represents a distinct analytical variable.

**S4.4. Step 3 – Data Extraction Procedure**

**Extraction Process**

1. Each report was read systematically in full.
2. Sections explicitly labeled as GRI-aligned disclosures, sustainability performance, ESG strategy, or environmental/social performance were prioritized.
3. For each indicator, relevant qualitative statements and quantitative metrics were extracted and recorded in an Excel worksheet.

**Extraction Rules**

- Both numerical data (e.g., energy consumption, emissions) and qualitative evidence (e.g., strategic commitments, governance structures) were included.
- When multiple disclosures existed for the same indicator, the most comprehensive and strategically relevant information was retained.
- Extracted data were logged with:
  - company name,
  - GRI indicator code,
  - short evidence description,
  - document type (annual or sustainability report),
  - page or section reference where feasible.

The output of this step constitutes Supplementary File S2 (Raw Extraction Dataset).

**S4.5. Step 4 – Data Cleaning and Standardization**

**Cleaning Procedures**

After extraction, the dataset underwent systematic cleaning to ensure comparability:

- Removal of duplicated disclosures across reports
- Harmonization of terminology (e.g., renewable energy definitions)
- Consistent labeling of indicators across firms
- Separation of descriptive text from evaluative notes

**Handling Missing or Uneven Disclosure**

- If an indicator was not disclosed, it was explicitly coded as “not disclosed” rather than left blank.
- Differences in report structure or disclosure style were not penalized, provided substantive information was present.

The cleaned and standardized dataset constitutes Supplementary File S3

**S4.6. Step 5 – Coding and Scoring Procedure**

**Scoring Framework**

Each indicator was scored using the 5-point ordinal scale documented in Supplementary File S1.

**Coding Logic**

- Scores reflect depth and strategic integration, not report length.
- Quantitative disclosure alone did not automatically yield high scores unless linked to targets, governance, or long-term strategy.
- In cases of ambiguity, conservative scoring was applied to avoid overestimation.

**Consistency Checks**

- Scoring decisions were reviewed iteratively to ensure internal consistency across firms and indicators.
- Similar disclosure patterns were assigned equivalent scores across companies.

**S4.7. Step 6 – Score Aggregation and Transformation**

**Aggregation**

For each firm, individual indicator scores were summed to calculate a Total GRI Score:

Total Scorei=∑j=16Indicator Scoreij\text{Total Score}_i = \sum_{j=1}^{6} \text{Indicator Score}_{ij}Total Scorei​=j=1∑6​Indicator Scoreij​

**Normalization**

To enable cross-company comparison, total scores were normalized:

Normalized Scorei=(Total Scorei30)×100\text{Normalized Score}_i = \left(\frac{\text{Total Score}_i}{30}\right) \times 100Normalized Scorei​=(30Total Scorei​​)×100

where 30 represents the maximum attainable score (6 indicators × 5 points).

**S4.8. Step 7 – S-Curve Classification Procedure**

Normalized scores were mapped onto the sustainability S-curve to interpret maturity stages:

| **Normalized Score (%)** | **Classification** |
| --- | --- |
| < 70% | Developing |
| 70–85% | Mature |
| > 85% | Leader / Saturation |

This classification is interpretative rather than econometric, consistent with the qualitative and comparative nature of the study.

**S4.9. Step 8 – Replication of Tables and Figures**

Using Supplementary Files S2 and S3, an independent reviewer can replicate:

- Environmental and social comparison tables
- Total score and normalized score tables
- Firm positioning along the S-curve

All tables in the manuscript correspond directly to fields in the processed dataset.

**S4.10. Step 9 – Methodological Boundaries and Validity Considerations**

- The study does not claim causal inference or statistical generalizability.
- Findings are illustrative and comparative, grounded in structured content analysis.
- Triangulation with external ESG ratings and third-party assurance statements enhances credibility but does not replace primary data extraction.

These boundaries are explicitly acknowledged in the manuscript.
