# Supplementary material for: Strategic Paths to Sustainability: A GRI-Based Comparative Analysis of Enerjisa, E.ON, and Enel in the Energy Sector
Source: Research Square preprint supplement (doi:10.21203/rs.3.rs-8212967/v1), 2026-01-09
Supplement: Supplementary file 3 [file 521a509ac582c544708c7b66.xlsx]

## Sheet: S3_Cleaned_Processed_Data
Company	GRI_Code	Indicator_Name	Cleaned_Evidence_Summary	Score_1_to_5	Scoring_Justification	Max_Score	Normalized_Score_Percent	S_Curve_Stage
Enerjisa	GRI 302	Renewable Energy	Moderate renewable integration with early-stage strategic alignment	3	Quantitative disclosure with limited long-term strategic integration	5	60	Developing
Enerjisa	GRI 305	Emission Reduction	Scope 1–2 emissions disclosed; no absolute net-zero target	3	Basic reduction targets without full decarbonization roadmap	5	60	Developing
Enerjisa	GRI 403	Occupational Health & Safety	Health and safety metrics disclosed with strong compliance focus	3	Compliance-oriented disclosure with limited strategic framing	5	60	Developing
Enerjisa	GRI 413	Community Engagement	CSR and volunteer projects described without impact metrics	3	Qualitative disclosure without structured impact measurement	5	60	Developing
Enerjisa	GRI 307	Regulatory Compliance	No environmental fines reported	5	Full regulatory compliance explicitly disclosed	5	100	Developing
Enerjisa	Net Zero	Net Zero Commitment	30% reduction target by 2030; no absolute net-zero year	2	Partial climate commitment without net-zero alignment	5	40	Developing
E.ON	GRI 302	Renewable Energy	High renewable share with operational integration	4	Advanced quantitative disclosure with strategic linkage	5	80	Mature
E.ON	GRI 305	Emission Reduction	Scope 1–3 emissions disclosed with 2040 net-zero target	4	Clear reduction pathway aligned with long-term strategy	5	80	Mature
E.ON	GRI 403	Occupational Health & Safety	Low TRIF/LTIF with systematic safety programs	4	Consistent quantitative performance and governance integration	5	80	Mature
E.ON	GRI 413	Community Engagement	Structured stakeholder and community programs	4	Formal engagement mechanisms described	5	80	Mature
E.ON	GRI 307	Regulatory Compliance	No major environmental fines reported	5	Proactive compliance and monitoring systems	5	100	Mature
E.ON	Net Zero	Net Zero Commitment	2040 net-zero commitment publicly stated	5	Clear, time-bound net-zero target	5	100	Mature
Enel	GRI 302	Renewable Energy	Large-scale renewable portfolio fully embedded in business model	5	Strategic integration with investment and governance linkage	5	100	Leader
Enel	GRI 305	Emission Reduction	Comprehensive Scope 1–3 disclosure with science-based targets	5	Advanced decarbonization roadmap and governance alignment	5	100	Leader
Enel	GRI 403	Occupational Health & Safety	Best-in-class safety performance metrics disclosed	5	Integrated safety culture and continuous improvement	5	100	Leader
Enel	GRI 413	Community Engagement	Measured social impact and co-creation initiatives	5	Quantified impact and strategic stakeholder integration	5	100	Leader
Enel	GRI 307	Regulatory Compliance	Environmental fines disclosed transparently	3	Disclosure of incidents despite financial penalties	5	60	Leader
Enel	Net Zero	Net Zero Commitment	2040 net-zero target aligned with EU climate goals	5	Clear and ambitious net-zero alignment	5	100	Leader
