# Supplementary material for: Strategic Paths to Sustainability: A GRI-Based Comparative Analysis of Enerjisa, E.ON, and Enel in the Energy Sector
Source: Research Square preprint supplement (doi:10.21203/rs.3.rs-8212967/v1), 2026-01-09
Supplement: Supplementary file 4 [file 58d20456c978db1589c154e5.xlsx]

## Sheet: S2_Full_Raw_Extraction
Company	Report_Type	Report_Year	GRI_Code	Indicator_Name	Extracted_Text_or_Metric	Metric_Unit	Page_or_Section_Reference	Evidence_Type	Notes
Enerjisa	Sustainability Report	2023	GRI 302	Energy	Total energy consumption and renewable capacity share disclosed	GJ / %	Energy & Climate	Quantitative
Enerjisa	Sustainability Report	2023	GRI 305	Emissions	Scope 1 and Scope 2 emissions reported with intensity indicators	tCO2e	Carbon Emissions	Quantitative	Scope 3 limited
Enerjisa	Sustainability Report	2023	Net Zero	Net Zero Target	Emission reduction target disclosed without a net-zero target year	%	Climate Strategy	Quantitative	Partial commitment
Enerjisa	Sustainability Report	2023	GRI 304	Biodiversity	Environmental impact assessments and biodiversity risk references	Narrative	Environmental Management	Qualitative
Enerjisa	Annual Report	2023	GRI 307	Compliance	No significant environmental fines reported	Narrative	Compliance & Legal	Qualitative
Enerjisa	Annual Report	2023	GRI 401	Employment	Total number of employees and turnover rates disclosed	Number / %	Human Resources	Quantitative
Enerjisa	Sustainability Report	2023	GRI 403	Health & Safety	TRIF and LTIF indicators reported	Rate	Occupational H&S	Quantitative
Enerjisa	Annual Report	2023	GRI 405	Diversity & Equality	Gender distribution and women in management disclosed	%	Diversity & Inclusion	Quantitative
Enerjisa	Sustainability Report	2023	GRI 413	Local Communities	Community investment and volunteer activities described	Narrative	Community Engagement	Qualitative
E.ON	Integrated Annual Report	2023	GRI 302	Energy	Renewable electricity share and energy mix disclosed	%	Energy Transition	Quantitative
E.ON	Integrated Annual Report	2023	GRI 305	Emissions	Scope 1–3 emissions disclosed with 2040 net-zero commitment	tCO2e	Decarbonisation	Quantitative
E.ON	Integrated Annual Report	2023	Net Zero	Net Zero Target	Public commitment to net-zero emissions by 2040	Year	Climate Targets	Quantitative
E.ON	Integrated Annual Report	2023	GRI 304	Biodiversity	Biodiversity protection measures and land-use impacts described	Narrative	Biodiversity	Qualitative
E.ON	Integrated Annual Report	2023	GRI 307	Compliance	Environmental compliance systems and monitoring disclosed	Narrative	Compliance & Risk	Qualitative
E.ON	Integrated Annual Report	2023	GRI 401	Employment	Workforce size, contracts, and turnover rates disclosed	Number / %	Workforce	Quantitative
E.ON	Integrated Annual Report	2023	GRI 403	Health & Safety	LTIF and safety performance indicators reported	Rate	Health & Safety	Quantitative
E.ON	Integrated Annual Report	2023	GRI 405	Diversity & Equality	Gender diversity and inclusion policies disclosed	%	Diversity & Inclusion	Quantitative
E.ON	Sustainability Portal	2023	GRI 413	Local Communities	Structured stakeholder and community engagement programs	Narrative	Stakeholder Engagement	Qualitative
Enel	Integrated Annual Report	2023	GRI 302	Energy	Large-scale renewable generation and installed capacity disclosed	GWh / %	Renewables	Quantitative
Enel	Sustainability Report	2023	GRI 305	Emissions	Scope 1–3 emissions disclosed with science-based targets	tCO2e	Climate Action	Quantitative	SBTi aligned
Enel	Integrated Annual Report	2023	Net Zero	Net Zero Target	Net-zero emissions target year aligned with EU climate goals (2040)	Year	Net Zero Strategy	Quantitative
Enel	Sustainability Report	2023	GRI 304	Biodiversity	Quantified biodiversity impacts and restoration initiatives	Narrative	Biodiversity	Qualitative
Enel	Integrated Annual Report	2023	GRI 307	Compliance	Environmental incidents and fines transparently disclosed	EUR	Compliance & Ethics	Quantitative
Enel	Integrated Annual Report	2023	GRI 401	Employment	Total workforce size and employment structure disclosed	Number	Human Capital	Quantitative
Enel	Sustainability Report	2023	GRI 403	Health & Safety	Safety KPIs and continuous improvement systems disclosed	Rate	Health & Safety	Quantitative
Enel	Integrated Annual Report	2023	GRI 405	Diversity & Equality	Gender equality and inclusion metrics disclosed	%	Diversity & Inclusion	Quantitative
Enel	Sustainability Report	2023	GRI 413	Local Communities	Measured social impact and co-creation initiatives reported	Narrative	Social Impact	Qualitative
